# Supplementary material
Source: PubMed Central journal article supplement (PMC4082405)

## Supplementary Information

Supplementary table 1 – Characteristics of 1146 cases and 1804 controls included in the ProtecT GWAS

|                                             | Control<br>n=1804 | Case<br>n=1146 | P-value* |
|---------------------------------------------|-------------------|----------------|----------|
| Age - mean (SD) <sup>a</sup>                | 61.6 (5.2)        | 62.2 (5.1)     | 0.002    |
| Social Class <sup>b</sup> – n(%)            |                   |                |          |
| Managerial and professional                 | 806 (44.7)        | 536 (46.8)     | 0.23     |
| Intermediate                                | 266 (14.8)        | 176 (15.4)     |          |
| Working                                     | 695 (38.5)        | 420 (36.7)     |          |
| Unknown                                     | 37 (2.1)          | 14 (1.2)       |          |
| Recruited Centre <sup>c</sup> - n(%)        |                   |                |          |
| Birmingham                                  | 83 (4.6)          | 53 (4.6)       | 0.52     |
| Bristol                                     | 176 (9.7)         | 118 (10.3)     |          |
| Cardiff                                     | 261 (14.5)        | 152 (13.3)     |          |
| Cambridge                                   | 150 (8.3)         | 86 (7.5)       |          |
| Edinburgh                                   | 100 (5.5)         | 56 (4.9)       |          |
| Leicester                                   | 263 (14.6)        | 159 (13.9)     |          |
| Leeds                                       | 191 (10.6)        | 121 (10.6)     |          |
| Newcastle                                   | 242 (13.4)        | 191 (16.7)     |          |
| Sheffield                                   | 338 (18.7)        | 210 (18.3)     |          |
| PSA level ng/ml - median (IQR) <sup>d</sup> | 0.6 (0.4,1.3)     | 5 (3.8,8.2)    |          |
| PSA Control Grouping                        |                   |                |          |
| <0.5 ng/ml (n=770)                          | 0.4 (0.3,0.4)     | -              |          |
| ≥0.5 & < 3 ng/ml (n=941)                    | 1.1 (0.7,1.7)     | -              |          |
| ≥3 ng/ml (n=93)                             | 3.9 (3.4,5.6)     | -              |          |
| Family History <sup>e</sup> - n(%)          |                   |                |          |
| Yes                                         | 90 (5.0)          | 83 (7.2)       | 0.02     |
| No                                          | 1522 (84.4)       | 930 (81.2)     |          |
| Unknown                                     | 192 (10.6)        | 133 (11.6)     |          |
| Gleason Score- n(%)                         |                   |                |          |
| 5                                           | -                 | 7 (0.6)        |          |
| 6                                           | -                 | 794 (69.3)     |          |
| 7                                           | -                 | 274 (23.9)     |          |
| 8                                           | -                 | 49 (4.3)       |          |
| 9                                           | -                 | 20 (1.8)       |          |
| Missing                                     | -                 | 2 (0.2)        |          |
| Tumour Stage- n(%)                          |                   |                |          |
| T1                                          | -                 | 695 (60.7)     |          |
| T2                                          | -                 | 249 (21.7)     |          |
| T3                                          | -                 | 107 (9.3)      |          |
| T4                                          | -                 | 4 (0.4)        |          |
| No code assigned/Missing                    | -                 | 91 (7.9)       |          |

<sup>a</sup> SD – Standard Deviation

<sup>b</sup> Three-class social categorization from Rose and O'Reilly (1998; 20)<sup>1</sup>

<sup>c</sup> Centre at which the participant was recruited

<sup>1</sup> Rose D, O'Reilly. The ESRC Review of Government Social Classifications. London: Office of National Statistics; 1998.

<sup>d</sup> Median and inter quartile range (IQR) reported as data not normally distributed. Wilcoxon rank-sum test used for p-value

<sup>e</sup> Family history of prostate cancer is coded yes if father or brother were diagnosed with prostate cancer

\* Chi<sup>2</sup> and t-tests were used to test for differences, unless otherwise stated

Supplementary table 2:381 SNPs associated with PrCa with  $P < 5 \times 10^{-5}$  in the ProtecT GWAS

| SNP        | Chr | Position  | Effect Allele | PROTECT (Discovery) |      |       |       | Pvalue   |
|------------|-----|-----------|---------------|---------------------|------|-------|-------|----------|
|            |     |           |               | Beta                | SE   | LCI   | UCI   |          |
| rs12682344 | 8   | 128175966 | G             | 0.57                | 0.13 | 0.32  | 0.83  | 1.28E-05 |
| rs6983561  | 8   | 128176062 | A             | -0.57               | 0.13 | -0.83 | -0.32 | 1.29E-05 |
| rs16901948 | 8   | 128176283 | A             | 0.57                | 0.13 | 0.31  | 0.83  | 1.36E-05 |
| rs16901949 | 8   | 128176335 | A             | -0.56               | 0.13 | -0.82 | -0.31 | 1.59E-05 |
| rs16901950 | 8   | 128176425 | A             | 0.56                | 0.13 | 0.31  | 0.82  | 1.60E-05 |
| rs16901952 | 8   | 128176452 | C             | 0.56                | 0.13 | 0.31  | 0.82  | 1.60E-05 |
| rs16901953 | 8   | 128177411 | C             | 0.56                | 0.13 | 0.31  | 0.81  | 1.61E-05 |
| rs7010450  | 8   | 128177861 | G             | 0.56                | 0.13 | 0.31  | 0.81  | 1.61E-05 |
| rs16901959 | 8   | 128178712 | A             | -0.56               | 0.13 | -0.81 | -0.30 | 1.64E-05 |
| rs7826388  | 8   | 128178958 | C             | -0.56               | 0.13 | -0.81 | -0.30 | 1.64E-05 |
| rs7830341  | 8   | 128179112 | A             | 0.56                | 0.13 | 0.30  | 0.81  | 1.64E-05 |
| rs16901966 | 8   | 128179434 | A             | -0.56               | 0.13 | -0.81 | -0.30 | 1.64E-05 |
| rs16901967 | 8   | 128179459 | A             | -0.56               | 0.13 | -0.81 | -0.30 | 1.64E-05 |
| rs7001069  | 8   | 128179828 | A             | -0.56               | 0.13 | -0.81 | -0.30 | 1.64E-05 |
| rs6988257  | 8   | 128180638 | C             | 0.56                | 0.13 | 0.30  | 0.81  | 1.64E-05 |
| rs16901969 | 8   | 128181279 | A             | -0.56               | 0.13 | -0.81 | -0.30 | 1.64E-05 |
| rs16901970 | 8   | 128181897 | G             | 0.56                | 0.13 | 0.30  | 0.81  | 1.64E-05 |
| rs10453084 | 8   | 128181961 | A             | 0.56                | 0.13 | 0.30  | 0.81  | 1.64E-05 |
| rs6987723  | 8   | 128182041 | A             | 0.56                | 0.13 | 0.30  | 0.81  | 1.64E-05 |
| rs6987640  | 8   | 128182210 | A             | -0.56               | 0.13 | -0.81 | -0.30 | 1.64E-05 |

| SNP        | Chr | Position  | Effect Allele | PROTECT (Discovery) |      |       |       | Pvalue   |
|------------|-----|-----------|---------------|---------------------|------|-------|-------|----------|
|            |     |           |               | Beta                | SE   | LCI   | UCI   |          |
| rs7824451  | 8   | 128183643 | C             | -0.56               | 0.13 | -0.81 | -0.30 | 1.64E-05 |
| rs7824785  | 8   | 128183892 | C             | -0.56               | 0.13 | -0.81 | -0.30 | 1.64E-05 |
| rs6470498  | 8   | 128184902 | A             | -0.56               | 0.13 | -0.81 | -0.30 | 1.64E-05 |
| rs7844219  | 8   | 128187997 | A             | -0.56               | 0.13 | -0.81 | -0.30 | 1.64E-05 |
| rs1551512  | 8   | 128193308 | G             | 0.56                | 0.13 | 0.30  | 0.81  | 1.64E-05 |
| rs16901979 | 8   | 128194098 | A             | 0.56                | 0.13 | 0.30  | 0.81  | 1.64E-05 |
| rs10505483 | 8   | 128194377 | C             | -0.56               | 0.13 | -0.81 | -0.30 | 1.64E-05 |
| rs7817677  | 8   | 128194686 | A             | -0.56               | 0.13 | -0.81 | -0.30 | 1.64E-05 |
| rs6989838  | 8   | 128198554 | C             | 0.56                | 0.13 | 0.30  | 0.81  | 1.66E-05 |
| rs7013255  | 8   | 128199669 | A             | -0.56               | 0.13 | -0.81 | -0.30 | 1.67E-05 |
| rs16901984 | 8   | 128200143 | C             | 0.56                | 0.13 | 0.30  | 0.81  | 1.69E-05 |
| rs10107982 | 8   | 128387937 | C             | -0.26               | 0.06 | -0.39 | -0.13 | 4.69E-05 |
| rs10956359 | 8   | 128411336 | C             | -0.27               | 0.06 | -0.39 | -0.15 | 1.20E-05 |
| rs17464492 | 8   | 128412048 | A             | 0.27                | 0.06 | 0.15  | 0.39  | 9.25E-06 |
| rs6983267  | 8   | 128482487 | G             | 0.22                | 0.05 | 0.11  | 0.32  | 4.25E-05 |
| rs6470519  | 8   | 128553405 | A             | 0.35                | 0.08 | 0.19  | 0.52  | 2.36E-05 |
| rs7818556  | 8   | 128553581 | A             | -0.35               | 0.08 | -0.52 | -0.19 | 2.36E-05 |
| rs1447295  | 8   | 128554220 | A             | 0.35                | 0.08 | 0.19  | 0.52  | 2.36E-05 |
| rs10109700 | 8   | 128555146 | A             | 0.35                | 0.08 | 0.19  | 0.52  | 2.38E-05 |
| rs11004422 | 10  | 51168342  | A             | -0.26               | 0.06 | -0.37 | -0.14 | 7.03E-06 |
| rs7071471  | 10  | 51173341  | C             | -0.29               | 0.06 | -0.40 | -0.17 | 4.67E-07 |
| rs2012677  | 10  | 51174803  | A             | -0.26               | 0.06 | -0.37 | -0.14 | 7.02E-06 |

| SNP        | Chr | Position | Effect Allele | PROTECT (Discovery) |      |       |       | Pvalue   |
|------------|-----|----------|---------------|---------------------|------|-------|-------|----------|
|            |     |          |               | Beta                | SE   | LCI   | UCI   |          |
| rs10825652 | 10  | 51180767 | A             | 0.28                | 0.06 | 0.17  | 0.39  | 4.54E-07 |
| rs2843560  | 10  | 51182135 | C             | -0.25               | 0.06 | -0.35 | -0.14 | 6.79E-06 |
| rs2611513  | 10  | 51185463 | C             | 0.27                | 0.06 | 0.16  | 0.38  | 8.67E-07 |
| rs2611512  | 10  | 51185540 | A             | 0.24                | 0.05 | 0.14  | 0.35  | 6.68E-06 |
| rs2926494  | 10  | 51187362 | C             | -0.27               | 0.05 | -0.38 | -0.17 | 3.22E-07 |
| rs2611508  | 10  | 51188053 | A             | -0.27               | 0.05 | -0.38 | -0.17 | 3.16E-07 |
| rs2843549  | 10  | 51191253 | A             | -0.27               | 0.05 | -0.38 | -0.17 | 3.12E-07 |
| rs2249986  | 10  | 51191690 | G             | -0.27               | 0.05 | -0.38 | -0.17 | 3.04E-07 |
| rs7077830  | 10  | 51192282 | C             | -0.27               | 0.05 | -0.38 | -0.17 | 3.01E-07 |
| rs2843554  | 10  | 51193867 | G             | 0.27                | 0.05 | 0.17  | 0.38  | 2.87E-07 |
| rs2611489  | 10  | 51194895 | A             | -0.27               | 0.05 | -0.38 | -0.17 | 2.79E-07 |
| rs3123078  | 10  | 51194977 | C             | 0.27                | 0.05 | 0.17  | 0.38  | 2.75E-07 |
| rs4935162  | 10  | 51195705 | C             | -0.27               | 0.05 | -0.38 | -0.17 | 2.70E-07 |
| rs7081532  | 10  | 51196099 | A             | 0.28                | 0.06 | 0.17  | 0.39  | 3.30E-07 |
| rs6481329  | 10  | 51199752 | A             | -0.28               | 0.05 | -0.38 | -0.18 | 1.48E-07 |
| rs10826125 | 10  | 51200511 | A             | -0.28               | 0.05 | -0.38 | -0.18 | 1.47E-07 |
| rs10826127 | 10  | 51200763 | A             | -0.28               | 0.05 | -0.38 | -0.18 | 1.45E-07 |
| rs4630240  | 10  | 51202534 | A             | -0.32               | 0.06 | -0.44 | -0.19 | 8.53E-07 |
| rs7920517  | 10  | 51202627 | A             | -0.28               | 0.05 | -0.38 | -0.18 | 1.34E-07 |
| rs4630241  | 10  | 51202757 | A             | -0.28               | 0.05 | -0.38 | -0.18 | 1.36E-07 |
| rs9787697  | 10  | 51203382 | C             | 0.28                | 0.05 | 0.18  | 0.38  | 1.37E-07 |
| rs10763534 | 10  | 51204926 | C             | 0.28                | 0.05 | 0.18  | 0.38  | 1.39E-07 |

| SNP        | Chr | Position | Effect Allele | PROTECT (Discovery) |      |       |       | Pvalue   |
|------------|-----|----------|---------------|---------------------|------|-------|-------|----------|
|            |     |          |               | Beta                | SE   | LCI   | UCI   |          |
| rs10763546 | 10  | 51206405 | C             | 0.28                | 0.05 | 0.18  | 0.38  | 1.43E-07 |
| rs4131357  | 10  | 51207298 | A             | -0.28               | 0.05 | -0.38 | -0.17 | 1.91E-07 |
| rs11006207 | 10  | 51208182 | C             | -0.28               | 0.05 | -0.38 | -0.17 | 1.97E-07 |
| rs10763576 | 10  | 51208819 | A             | 0.28                | 0.05 | 0.17  | 0.38  | 1.95E-07 |
| rs10763588 | 10  | 51209768 | G             | 0.28                | 0.05 | 0.17  | 0.38  | 1.90E-07 |
| rs4630243  | 10  | 51210873 | C             | -0.28               | 0.05 | -0.38 | -0.17 | 1.84E-07 |
| rs4512771  | 10  | 51210912 | A             | -0.28               | 0.05 | -0.38 | -0.18 | 1.79E-07 |
| rs4306255  | 10  | 51212450 | A             | 0.27                | 0.06 | 0.16  | 0.38  | 9.33E-07 |
| rs4631830  | 10  | 51213350 | C             | 0.27                | 0.06 | 0.16  | 0.38  | 8.13E-07 |
| rs7075009  | 10  | 51214149 | G             | -0.28               | 0.05 | -0.39 | -0.18 | 1.37E-07 |
| rs7098889  | 10  | 51214481 | C             | 0.28                | 0.05 | 0.18  | 0.39  | 1.35E-07 |
| rs4304716  | 10  | 51214593 | A             | 0.27                | 0.06 | 0.16  | 0.38  | 7.16E-07 |
| rs7075697  | 10  | 51217377 | C             | 0.28                | 0.06 | 0.17  | 0.39  | 4.54E-07 |
| rs10993994 | 10  | 51219502 | C             | -0.33               | 0.06 | -0.44 | -0.22 | 1.58E-09 |
| rs7222314  | 17  | 66616533 | A             | 0.32                | 0.06 | 0.21  | 0.43  | 8.59E-09 |
| rs17765344 | 17  | 66618469 | A             | 0.32                | 0.05 | 0.21  | 0.42  | 5.85E-09 |
| rs8071558  | 17  | 66619268 | C             | 0.32                | 0.05 | 0.21  | 0.42  | 5.83E-09 |
| rs8072254  | 17  | 66619411 | A             | 0.32                | 0.05 | 0.21  | 0.42  | 5.76E-09 |
| rs984434   | 17  | 66619722 | C             | -0.32               | 0.05 | -0.42 | -0.21 | 5.74E-09 |
| rs1859962  | 17  | 66620348 | G             | 0.32                | 0.05 | 0.21  | 0.42  | 5.72E-09 |
| rs11650165 | 17  | 66621213 | C             | 0.31                | 0.06 | 0.20  | 0.42  | 5.29E-08 |
| rs991429   | 17  | 66621368 | A             | -0.32               | 0.05 | -0.42 | -0.21 | 5.42E-09 |
| rs4793528  | 17  | 66622368 | A             | 0.31                | 0.06 | 0.20  | 0.42  | 4.81E-08 |

| SNP        | Chr | Position | Effect Allele | PROTECT (Discovery) |      |       |       | Pvalue   |
|------------|-----|----------|---------------|---------------------|------|-------|-------|----------|
|            |     |          |               | Beta                | SE   | LCI   | UCI   |          |
| rs9674957  | 17  | 66622693 | A             | -0.31               | 0.06 | -0.42 | -0.20 | 4.70E-08 |
| rs8077906  | 17  | 66623828 | A             | -0.32               | 0.06 | -0.43 | -0.21 | 3.07E-08 |
| rs8066875  | 17  | 66625172 | A             | 0.32                | 0.06 | 0.21  | 0.43  | 2.90E-08 |
| rs9889335  | 17  | 66626741 | G             | -0.32               | 0.05 | -0.42 | -0.21 | 4.64E-09 |
| rs4328484  | 17  | 66627825 | A             | -0.31               | 0.06 | -0.42 | -0.20 | 3.65E-08 |
| rs8068266  | 17  | 66628530 | A             | 0.33                | 0.06 | 0.22  | 0.44  | 1.95E-09 |
| rs4793529  | 17  | 66630231 | C             | -0.33               | 0.06 | -0.44 | -0.22 | 1.88E-09 |
| rs7217652  | 17  | 66631076 | C             | -0.33               | 0.06 | -0.45 | -0.22 | 1.58E-08 |
| rs6501437  | 17  | 66631567 | C             | -0.29               | 0.06 | -0.39 | -0.18 | 2.10E-07 |
| rs6501438  | 17  | 66631755 | A             | 0.29                | 0.06 | 0.18  | 0.39  | 2.11E-07 |
| rs8079315  | 17  | 66632450 | C             | 0.29                | 0.06 | 0.18  | 0.39  | 2.11E-07 |
| rs2367256  | 17  | 66632881 | A             | 0.29                | 0.06 | 0.18  | 0.39  | 2.12E-07 |
| rs2190697  | 17  | 66632936 | A             | 0.29                | 0.06 | 0.18  | 0.39  | 2.21E-07 |
| rs4366746  | 17  | 66633226 | C             | -0.28               | 0.05 | -0.38 | -0.17 | 3.77E-07 |
| rs4366747  | 17  | 66633238 | A             | -0.28               | 0.05 | -0.38 | -0.17 | 3.88E-07 |
| rs2159034  | 17  | 66633350 | A             | -0.28               | 0.05 | -0.38 | -0.17 | 4.02E-07 |
| rs1013999  | 17  | 66633530 | C             | 0.28                | 0.05 | 0.17  | 0.38  | 4.05E-07 |
| rs4793530  | 17  | 66636858 | C             | 0.28                | 0.05 | 0.17  | 0.38  | 4.08E-07 |
| rs11654749 | 17  | 66637201 | G             | 0.25                | 0.06 | 0.15  | 0.36  | 4.72E-06 |
| rs11653132 | 17  | 66641427 | G             | 0.25                | 0.06 | 0.14  | 0.35  | 6.75E-06 |
| rs4300694  | 17  | 66642431 | C             | -0.25               | 0.06 | -0.36 | -0.15 | 4.77E-06 |
| rs8076830  | 17  | 66643504 | C             | -0.27               | 0.05 | -0.38 | -0.17 | 4.29E-07 |

| SNP        | Chr | Position | Effect Allele | PROTECT (Discovery) |      |       |       | Pvalue   |
|------------|-----|----------|---------------|---------------------|------|-------|-------|----------|
|            |     |          |               | Beta                | SE   | LCI   | UCI   |          |
| rs9900242  | 17  | 66647226 | A             | -0.25               | 0.06 | -0.36 | -0.14 | 4.87E-06 |
| rs9908442  | 17  | 66649543 | A             | -0.25               | 0.06 | -0.36 | -0.14 | 4.95E-06 |
| rs2058083  | 17  | 66649998 | C             | 0.25                | 0.06 | 0.14  | 0.36  | 5.12E-06 |
| rs2058084  | 17  | 66650612 | C             | 0.25                | 0.06 | 0.14  | 0.36  | 5.20E-06 |
| rs2058085  | 17  | 66650642 | A             | 0.25                | 0.06 | 0.14  | 0.36  | 5.37E-06 |
| rs9915190  | 17  | 66654223 | A             | -0.25               | 0.06 | -0.36 | -0.14 | 5.77E-06 |
| rs2041114  | 17  | 66656212 | A             | 0.27                | 0.05 | 0.16  | 0.37  | 7.51E-07 |
| rs723338   | 17  | 66657008 | A             | 0.27                | 0.05 | 0.16  | 0.37  | 7.60E-07 |
| rs2041115  | 17  | 66658022 | A             | 0.27                | 0.05 | 0.16  | 0.37  | 7.88E-07 |
| rs8064263  | 17  | 66658425 | A             | 0.27                | 0.05 | 0.16  | 0.37  | 8.07E-07 |
| rs9897865  | 17  | 66658671 | A             | -0.27               | 0.05 | -0.37 | -0.16 | 8.28E-07 |
| rs11656242 | 17  | 66659117 | A             | 0.26                | 0.05 | 0.15  | 0.36  | 1.96E-06 |
| rs9897358  | 17  | 66659137 | A             | -0.27               | 0.05 | -0.37 | -0.16 | 8.71E-07 |
| rs11651123 | 17  | 66659186 | A             | -0.26               | 0.05 | -0.36 | -0.15 | 2.07E-06 |
| rs11657298 | 17  | 66659231 | C             | -0.26               | 0.05 | -0.36 | -0.15 | 2.09E-06 |
| rs11651469 | 17  | 66660114 | G             | -0.27               | 0.05 | -0.37 | -0.16 | 7.28E-07 |
| rs11651501 | 17  | 66660153 | A             | -0.27               | 0.05 | -0.37 | -0.16 | 7.30E-07 |
| rs719615   | 17  | 66661505 | A             | -0.26               | 0.05 | -0.36 | -0.15 | 2.08E-06 |
| rs1558119  | 17  | 66663567 | C             | 0.26                | 0.05 | 0.15  | 0.36  | 2.06E-06 |
| rs12150098 | 17  | 66667429 | C             | -0.26               | 0.05 | -0.36 | -0.15 | 2.05E-06 |
| rs9910829  | 17  | 66671172 | A             | 0.27                | 0.05 | 0.16  | 0.37  | 9.41E-07 |
| rs7220274  | 17  | 66671362 | A             | 0.27                | 0.05 | 0.16  | 0.37  | 9.41E-07 |
| rs17224833 | 17  | 66672070 | A             | 0.27                | 0.05 | 0.16  | 0.37  | 9.42E-07 |



| SNP        | Chr | Position | Effect Allele | PROTECT (Discovery) |      |       |       | Pvalue   |
|------------|-----|----------|---------------|---------------------|------|-------|-------|----------|
|            |     |          |               | Beta                | SE   | LCI   | UCI   |          |
| rs2108534  | 17  | 66672495 | A             | 0.27                | 0.05 | 0.16  | 0.37  | 9.44E-07 |
| rs2108535  | 17  | 66672740 | G             | -0.26               | 0.05 | -0.36 | -0.15 | 1.99E-06 |
| rs8182284  | 17  | 66672986 | A             | -0.26               | 0.05 | -0.36 | -0.15 | 1.98E-06 |
| rs8182286  | 17  | 66673149 | C             | -0.27               | 0.05 | -0.37 | -0.16 | 9.47E-07 |
| rs4793533  | 17  | 66676066 | C             | -0.27               | 0.05 | -0.37 | -0.16 | 9.48E-07 |
| rs8069925  | 17  | 66676457 | A             | 0.27                | 0.05 | 0.16  | 0.37  | 9.49E-07 |
| rs8068189  | 17  | 66676490 | C             | -0.25               | 0.05 | -0.36 | -0.15 | 2.66E-06 |
| rs9901508  | 17  | 66676794 | A             | 0.27                | 0.05 | 0.16  | 0.37  | 9.51E-07 |
| rs9907418  | 17  | 66676814 | C             | -0.27               | 0.05 | -0.37 | -0.16 | 9.52E-07 |
| rs2367263  | 17  | 66677883 | A             | -0.25               | 0.05 | -0.36 | -0.15 | 3.30E-06 |
| rs1859964  | 17  | 66678166 | G             | -0.25               | 0.05 | -0.36 | -0.15 | 3.31E-06 |
| rs1859965  | 17  | 66678690 | C             | 0.25                | 0.05 | 0.15  | 0.36  | 3.32E-06 |
| rs6501446  | 17  | 66679653 | G             | -0.25               | 0.05 | -0.36 | -0.15 | 3.32E-06 |
| rs4793534  | 17  | 66679888 | C             | 0.25                | 0.05 | 0.14  | 0.35  | 4.89E-06 |
| rs4239156  | 17  | 66679976 | C             | -0.25               | 0.05 | -0.36 | -0.15 | 3.34E-06 |
| rs4793335  | 17  | 66680286 | A             | -0.25               | 0.05 | -0.35 | -0.14 | 5.25E-06 |
| rs2097984  | 17  | 66682821 | C             | -0.25               | 0.05 | -0.35 | -0.14 | 5.37E-06 |
| rs11654068 | 17  | 66684131 | C             | 0.23                | 0.06 | 0.12  | 0.34  | 2.80E-05 |
| rs8079962  | 17  | 66684297 | A             | 0.25                | 0.05 | 0.14  | 0.36  | 3.44E-06 |
| rs6501447  | 17  | 66684693 | C             | -0.25               | 0.05 | -0.36 | -0.14 | 3.45E-06 |
| rs2886914  | 17  | 66685408 | C             | 0.25                | 0.05 | 0.14  | 0.35  | 4.35E-06 |
| rs8076811  | 17  | 66687002 | A             | 0.25                | 0.05 | 0.14  | 0.36  | 3.48E-06 |

| SNP        | Chr | Position | Effect Allele | PROTECT (Discovery) |      |       |       | Pvalue   |
|------------|-----|----------|---------------|---------------------|------|-------|-------|----------|
|            |     |          |               | Beta                | SE   | LCI   | UCI   |          |
| rs17178251 | 17  | 66688474 | C             | 0.25                | 0.05 | 0.14  | 0.35  | 4.30E-06 |
| rs17765644 | 17  | 66691087 | C             | -0.25               | 0.05 | -0.35 | -0.14 | 4.45E-06 |
| rs9913988  | 17  | 66691653 | C             | -0.25               | 0.05 | -0.35 | -0.14 | 3.76E-06 |
| rs758106   | 17  | 66692598 | C             | -0.25               | 0.05 | -0.35 | -0.14 | 3.78E-06 |
| rs740408   | 17  | 66692691 | A             | 0.24                | 0.05 | 0.13  | 0.35  | 7.63E-06 |
| rs4570900  | 17  | 66697961 | A             | -0.25               | 0.05 | -0.35 | -0.14 | 3.94E-06 |
| rs4611499  | 17  | 66700364 | C             | -0.25               | 0.05 | -0.35 | -0.14 | 3.93E-06 |
| rs7214479  | 17  | 66702544 | C             | -0.25               | 0.05 | -0.35 | -0.14 | 3.81E-06 |
| rs1008348  | 17  | 66702911 | A             | -0.25               | 0.05 | -0.35 | -0.14 | 4.90E-06 |
| rs6501449  | 17  | 66704440 | C             | 0.27                | 0.06 | 0.16  | 0.38  | 2.13E-06 |
| rs6501451  | 17  | 66704726 | C             | -0.25               | 0.05 | -0.35 | -0.14 | 4.72E-06 |
| rs6501452  | 17  | 66704882 | A             | -0.24               | 0.05 | -0.34 | -0.13 | 8.22E-06 |
| rs11870732 | 17  | 66706836 | A             | 0.25                | 0.05 | 0.14  | 0.35  | 4.73E-06 |
| rs17178370 | 17  | 66707136 | A             | -0.25               | 0.05 | -0.35 | -0.14 | 4.65E-06 |
| rs7225025  | 17  | 66709269 | A             | 0.24                | 0.05 | 0.14  | 0.34  | 8.04E-06 |
| rs17178377 | 17  | 66709728 | A             | -0.24               | 0.05 | -0.35 | -0.14 | 5.84E-06 |
| rs11655744 | 17  | 66710651 | C             | -0.25               | 0.05 | -0.35 | -0.14 | 4.50E-06 |
| rs2367266  | 17  | 66711582 | C             | -0.25               | 0.05 | -0.35 | -0.14 | 4.42E-06 |
| rs1107305  | 17  | 66712238 | G             | 0.24                | 0.05 | 0.14  | 0.34  | 6.81E-06 |
| rs6501455  | 17  | 66713406 | A             | 0.24                | 0.05 | 0.14  | 0.34  | 7.20E-06 |
| rs7209505  | 17  | 66715259 | A             | 0.25                | 0.05 | 0.14  | 0.35  | 3.98E-06 |
| rs2190463  | 17  | 66719063 | C             | -0.25               | 0.05 | -0.35 | -0.14 | 3.85E-06 |
| rs2190456  | 17  | 66722961 | C             | 0.24                | 0.05 | 0.14  | 0.34  | 6.66E-06 |

| SNP        | Chr | Position | Effect Allele | PROTECT (Discovery) |      |       |       | Pvalue   |
|------------|-----|----------|---------------|---------------------|------|-------|-------|----------|
|            |     |          |               | Beta                | SE   | LCI   | UCI   |          |
| rs983085   | 17  | 66723656 | A             | 0.24                | 0.05 | 0.14  | 0.34  | 6.79E-06 |
| rs6501459  | 17  | 66725050 | C             | 0.25                | 0.05 | 0.14  | 0.35  | 4.75E-06 |
| rs4793538  | 17  | 66727523 | C             | 0.24                | 0.05 | 0.14  | 0.35  | 5.51E-06 |
| rs2158905  | 17  | 66727636 | C             | 0.24                | 0.05 | 0.13  | 0.34  | 8.68E-06 |
| rs2190457  | 17  | 66728004 | A             | -0.24               | 0.05 | -0.35 | -0.14 | 5.85E-06 |
| rs11655567 | 17  | 66728282 | C             | -0.24               | 0.05 | -0.34 | -0.13 | 8.90E-06 |
| rs7225458  | 17  | 66729941 | A             | 0.24                | 0.05 | 0.14  | 0.35  | 6.01E-06 |
| rs10401004 | 17  | 66730351 | A             | 0.24                | 0.05 | 0.14  | 0.35  | 6.58E-06 |
| rs917278   | 17  | 66733520 | C             | 0.25                | 0.05 | 0.14  | 0.35  | 4.81E-06 |
| rs1978203  | 17  | 66734264 | C             | -0.25               | 0.05 | -0.35 | -0.14 | 4.84E-06 |
| rs1978204  | 17  | 66734540 | A             | -0.25               | 0.05 | -0.35 | -0.14 | 4.84E-06 |
| rs737956   | 17  | 66735463 | A             | -0.25               | 0.05 | -0.35 | -0.14 | 6.67E-06 |
| rs737957   | 17  | 66735504 | A             | 0.25                | 0.06 | 0.14  | 0.35  | 6.62E-06 |
| rs8075481  | 17  | 66735791 | C             | 0.25                | 0.06 | 0.14  | 0.36  | 6.56E-06 |
| rs7224058  | 17  | 66737374 | C             | -0.26               | 0.06 | -0.37 | -0.15 | 4.41E-06 |
| rs7215307  | 17  | 66737962 | A             | -0.26               | 0.06 | -0.37 | -0.14 | 7.31E-06 |
| rs4793541  | 17  | 66739190 | C             | -0.25               | 0.06 | -0.36 | -0.14 | 1.04E-05 |
| rs7221080  | 17  | 66741567 | C             | -0.28               | 0.06 | -0.39 | -0.16 | 1.47E-06 |
| rs8064388  | 17  | 66742612 | A             | -0.26               | 0.06 | -0.37 | -0.15 | 5.04E-06 |
| rs9906756  | 17  | 66747639 | A             | 0.27                | 0.06 | 0.15  | 0.38  | 9.61E-06 |
| rs17178530 | 17  | 66747707 | C             | -0.26               | 0.06 | -0.37 | -0.14 | 1.75E-05 |
| rs17765886 | 17  | 66747800 | C             | 0.26                | 0.06 | 0.14  | 0.37  | 1.74E-05 |
| rs8070461  | 17  | 66752467 | G             | 0.29                | 0.06 | 0.17  | 0.41  | 4.84E-06 |
| rs9891216  | 17  | 66754527 | C             | 0.29                | 0.07 | 0.16  | 0.42  | 1.18E-05 |

| SNP        | Chr | Position | Effect Allele | PROTECT (Discovery) |      |       |       | Pvalue   |
|------------|-----|----------|---------------|---------------------|------|-------|-------|----------|
|            |     |          |               | Beta                | SE   | LCI   | UCI   |          |
| rs2659051  | 19  | 56037380 | C             | -0.36               | 0.08 | -0.51 | -0.20 | 6.21E-06 |
| rs266849   | 19  | 56040902 | A             | 0.29                | 0.07 | 0.15  | 0.43  | 3.87E-05 |
| rs266870   | 19  | 56043746 | C             | 0.28                | 0.05 | 0.17  | 0.38  | 3.13E-07 |
| rs174776   | 19  | 56051664 | C             | 0.38                | 0.08 | 0.22  | 0.53  | 1.14E-06 |
| rs17632542 | 19  | 56053569 | C             | -0.60               | 0.11 | -0.80 | -0.39 | 1.28E-08 |
| rs2659122  | 19  | 56054838 | C             | -0.35               | 0.06 | -0.47 | -0.22 | 4.10E-08 |
| rs1058205  | 19  | 56055210 | C             | -0.40               | 0.07 | -0.54 | -0.26 | 4.63E-08 |
| rs2569735  | 19  | 56056081 | A             | -0.43               | 0.08 | -0.58 | -0.27 | 8.13E-08 |
| rs2735839  | 19  | 56056435 | A             | -0.43               | 0.08 | -0.58 | -0.27 | 8.19E-08 |

Supplementary Table 3 –Association of SNPs with prostate cancer using low PSA controls in ProtecT for SNPs with moderate-high levels of heterogeneity\* and meta-analysis of the results with UKGPCS

| SNP        | Chrom | Position  | Region   | Gene                 | Effect Allele | ProtecT |      |                  |          | UKGPCS  |      |      |          | Combined (Meta-Results) |             |          |                             |                    |
|------------|-------|-----------|----------|----------------------|---------------|---------|------|------------------|----------|---------|------|------|----------|-------------------------|-------------|----------|-----------------------------|--------------------|
|            |       |           |          |                      |               | $\beta$ | SE   | EAF <sup>a</sup> | P-value  | $\beta$ | SE   | EAF* | P-value  | $\beta$                 | (95% CI)    | P-value  | I <sup>2</sup> <sup>b</sup> | P-Het <sup>c</sup> |
| rs6983267  | 8     | 128482487 | 8q24.21  | SRRM1P1 -<br>POU5F1B | G             | 0.25    | 0.06 | 0.52             | 9.62E-05 | 0.36    | 0.05 | 0.53 | 2.30E-12 | 0.32                    | (0.24,0.40) | 3.46E-15 | 38.0%                       | 0.20               |
| rs1447295  | 8     | 128554220 | 8q24.21  | POU5F1B -<br>MYC     | A             | 0.34    | 0.11 | 0.11             | 1.05E-03 | 0.67    | 0.08 | 0.12 | 1.20E-16 | 0.55                    | (0.42,0.67) | 1.18E-16 | 83.1%                       | 0.01               |
| rs10993994 | 10    | 51219502  | 10q11.23 | MSMB                 | T             | 0.47    | 0.07 | 0.40             | 3.75E-12 | 0.46    | 0.05 | 0.40 | 2.15E-19 | 0.46                    | (0.38,0.55) | 4.06E-29 | 0.0%                        | 0.90               |
| rs17632542 | 19    | 56053569  | 19q13.33 | KLK3                 | T             | 0.99    | 0.12 | 0.91             | 3.84E-18 | 0.82    | 0.08 | 0.89 | 4.74E-23 | 0.88                    | (0.74,1.01) | 3.25E-37 | 32.3%                       | 0.22               |

\*I<sup>2</sup>>50% in original meta-analysis with all ProtecT controls

<sup>a</sup> Effect Allele Frequency

<sup>b</sup> % of variation between study-specific effect estimates which is due to heterogeneity

<sup>c</sup> Tests the hypothesis that there is no difference in the study-specific effect estimates

Supplementary table 4 – Comparison of cases with low (PSA <0.05ng/ml) and high (PSA ≥2 ng/ml) PSA controls (sensitivity analysis)\*

| SNP        | Low PSA controls (n=770) |          | High PSA controls(n=250) |          | <i>p</i> het <sup>a</sup> |
|------------|--------------------------|----------|--------------------------|----------|---------------------------|
|            | OR (SE)                  | <i>p</i> | OR (SE)                  | <i>p</i> |                           |
| rs9311171  | 1.07 (0.10)              | 0.49     | 1.48 (0.19)              | 0.003    | 0.02                      |
| rs6869841  | 1.35 (0.11)              | 3.44E-04 | 0.97 (0.11)              | 0.77     | 0.01                      |
| rs1512268  | 1.3 (0.09)               | 9.56E-05 | 1.06 (0.11)              | 0.55     | 0.05                      |
| rs445114   | 1.46 (0.01)              | 8.17E-08 | 1.07 (0.11)              | 0.54     | 0.01                      |
| rs11199874 | 1.24 (0.06)              | 0.01     | 0.87 (0.13)              | 0.20     | 0.002                     |
| rs10788160 | 1.24 (0.06)              | 0.01     | 0.88 (0.13)              | 0.22     | 0.003                     |
| rs10993994 | 1.61 (0.11)              | 4.55E-12 | 1.3 (0.13)               | 0.01     | 0.04                      |
| rs17632542 | 2.73 (0.32)              | 1.39E-17 | 0.86 (0.19)              | 0.49     | 3.39E-08                  |
| rs2735839  | 2.13 (0.20)              | 1.90E-16 | 1.02 (0.16)              | 0.89     | 1.18E-06                  |
| rs266849   | 1.76 (0.45)              | 8.62E-12 | 1.06 (0.12)              | 0.68     | 9.83E-05                  |
| rs4775302  | 1.02 (0.07)              | 0.76     | 1.29 (0.13)              | 0.01     | 0.03                      |

\* SNPs showing evidence of heterogeneity ( $p < 0.05$ ) in effect estimates quantifying the difference in risk between cases and low or high PSA controls

<sup>a</sup> Tests the hypothesis that there is no difference between the effect estimate of the cases vs. low PSA controls and cases vs. high PSA controls

Supplementary Figure 1 – Quantile-quantile plot (Q-Q plot) for ProtecT GWAS

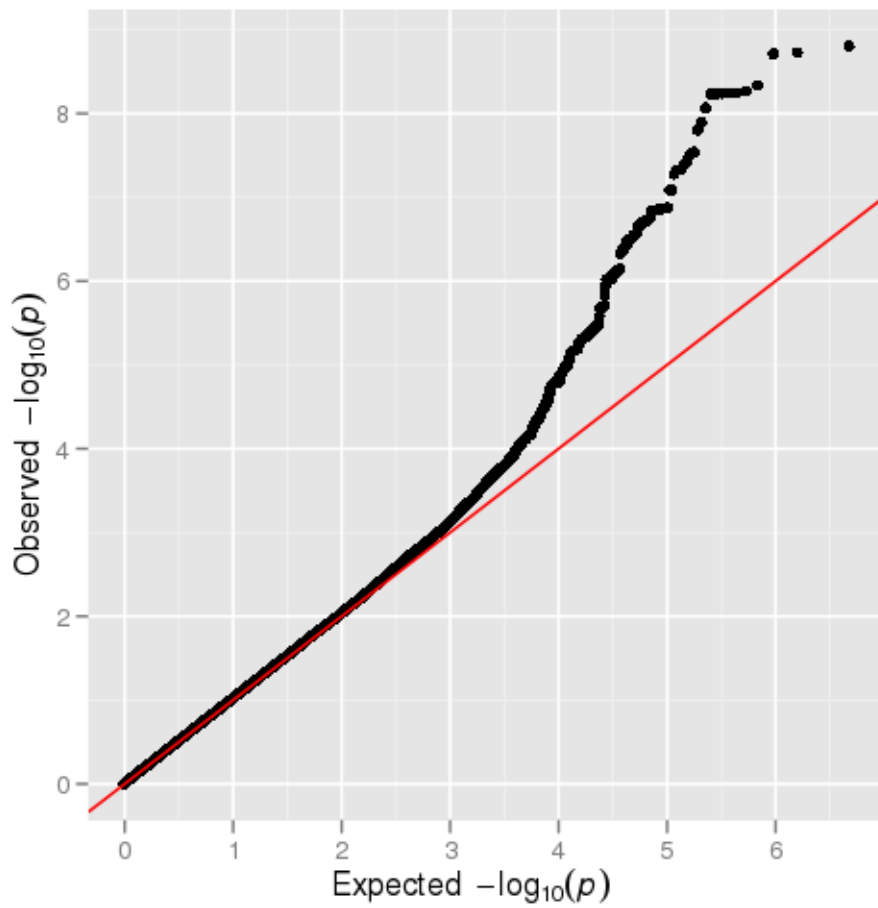

Q-Q plot shows the distribution of test statistics for comparison of genotype frequencies in cases versus controls

Supplementary Figure 2 – Manhattan Plot for ProtecT GWAS

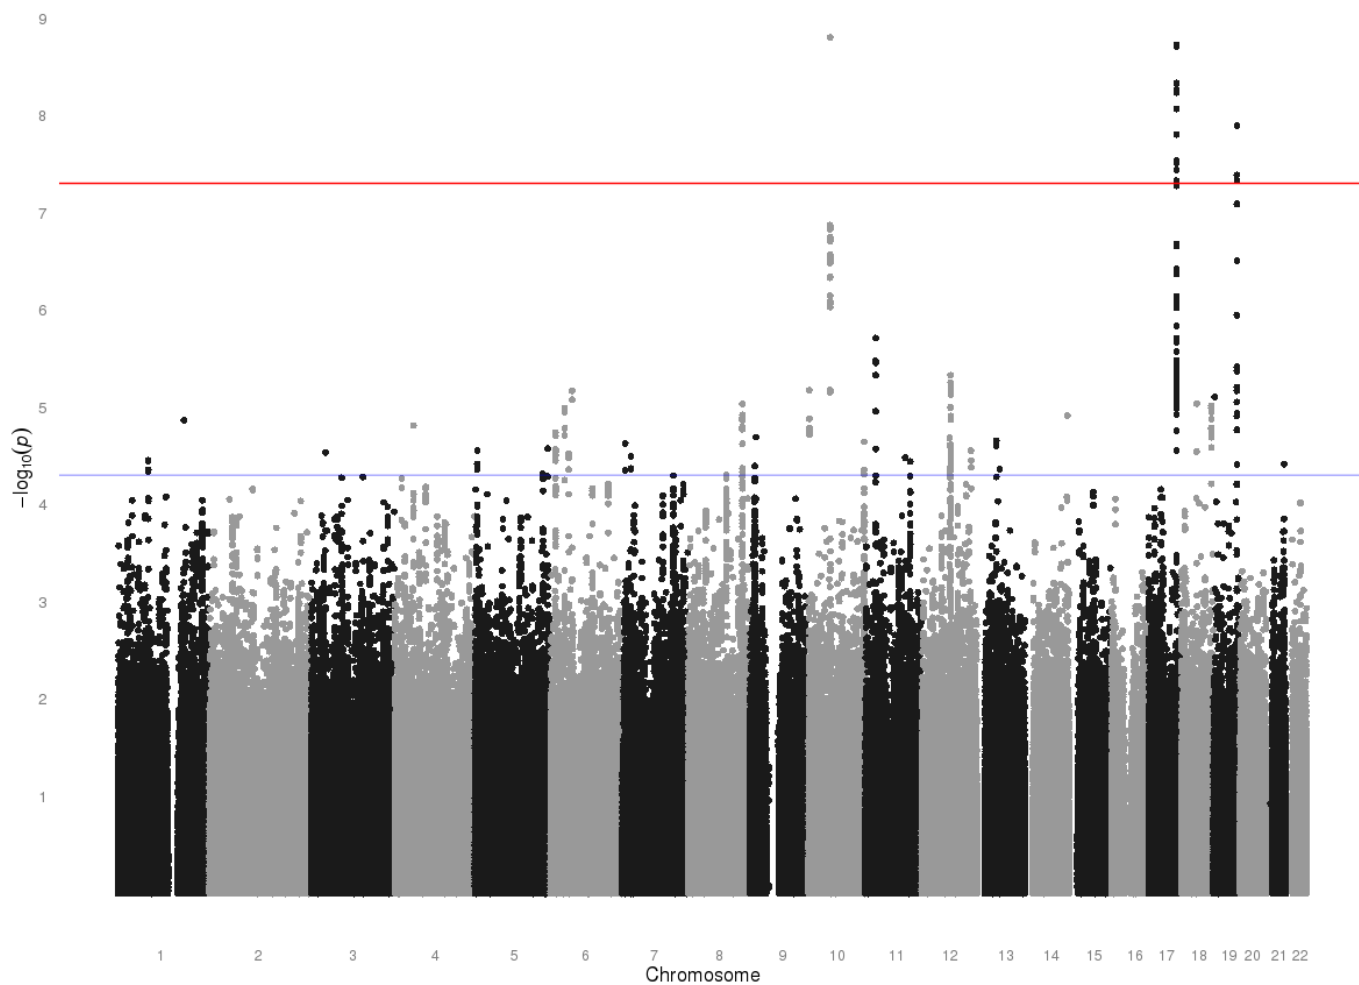

Manhattan plots of the association p-values for prostate cancer in ProtecT. Analysed SNPs are plotted on the X-axis in the order of chromosome location. The log p-values are plotted on the Y-axis. The red line indicated the genome wide significance levels ( $p < 5 \times 10^{-8}$ )



Supplementary Figure 3 – Locus Zoom<sup>2</sup> plot of region 10q11.23 of the ProtecT GWAS

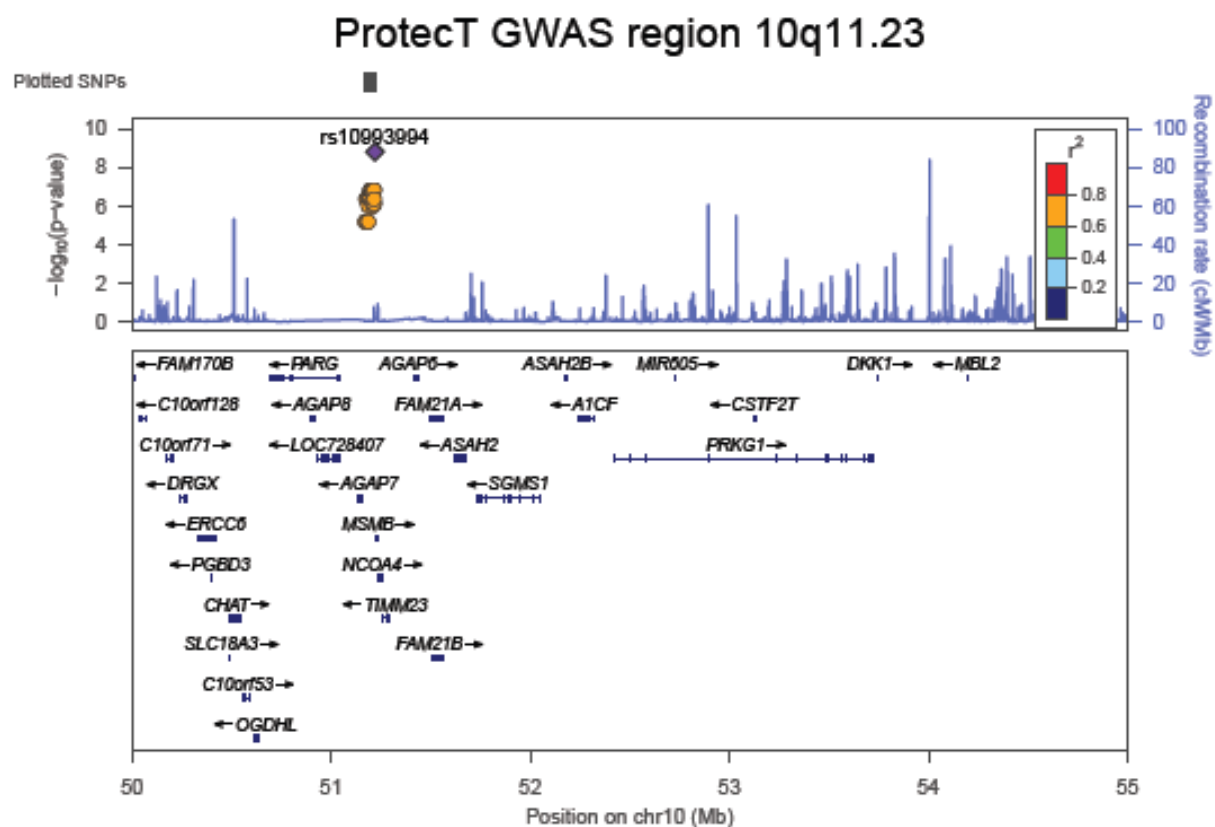

<sup>2</sup> Pruim RJ\*, Welch RP\*, Sanna S, Teslovich TM, Chines PS, Gliedt TP, Boehnke M, Abecasis GR, Willer CJ. (2010) LocusZoom: Regional visualization of genome-wide association scan results. *Bioinformatics* 2010 September 15; 26(18): 2336.2337.

Supplementary Figure 4 - Locus Zoom<sup>2</sup> plot of region 17q24.3 of the ProtecT GWAS

### ProtecT GWAS region 17q24.3

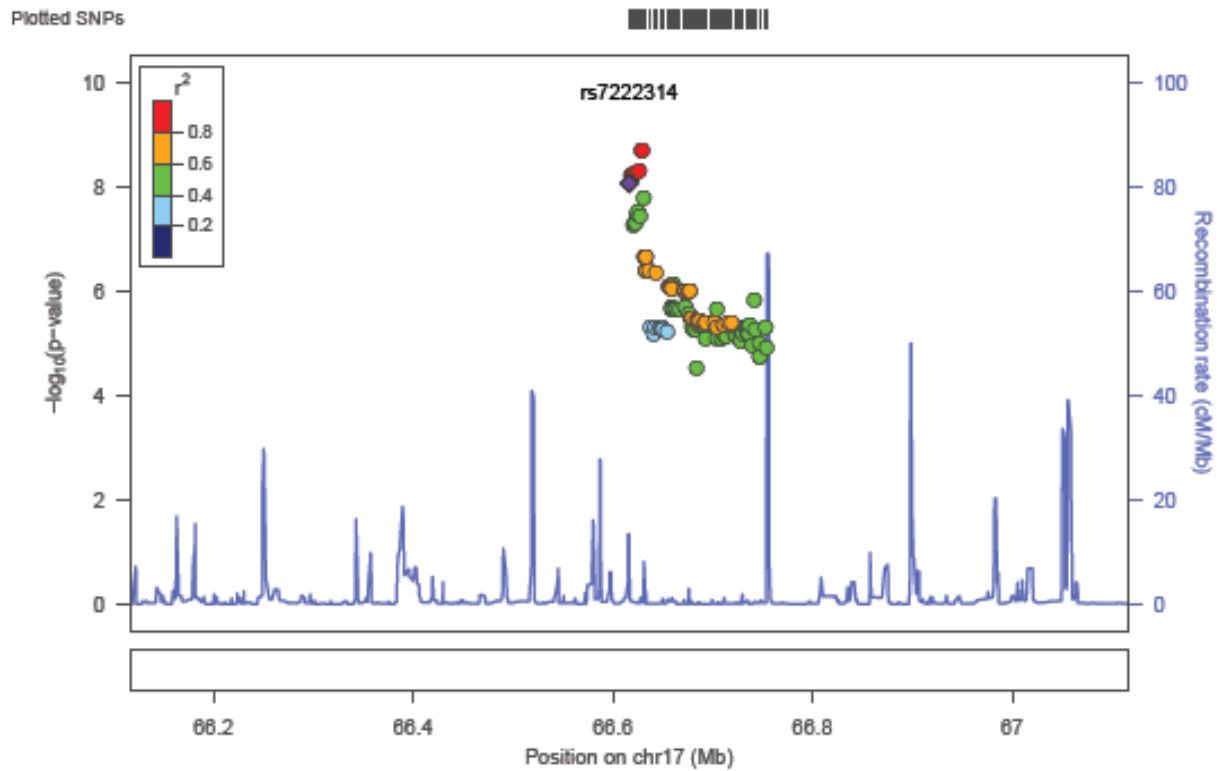

### ProtecT GWAS region 19q13.33

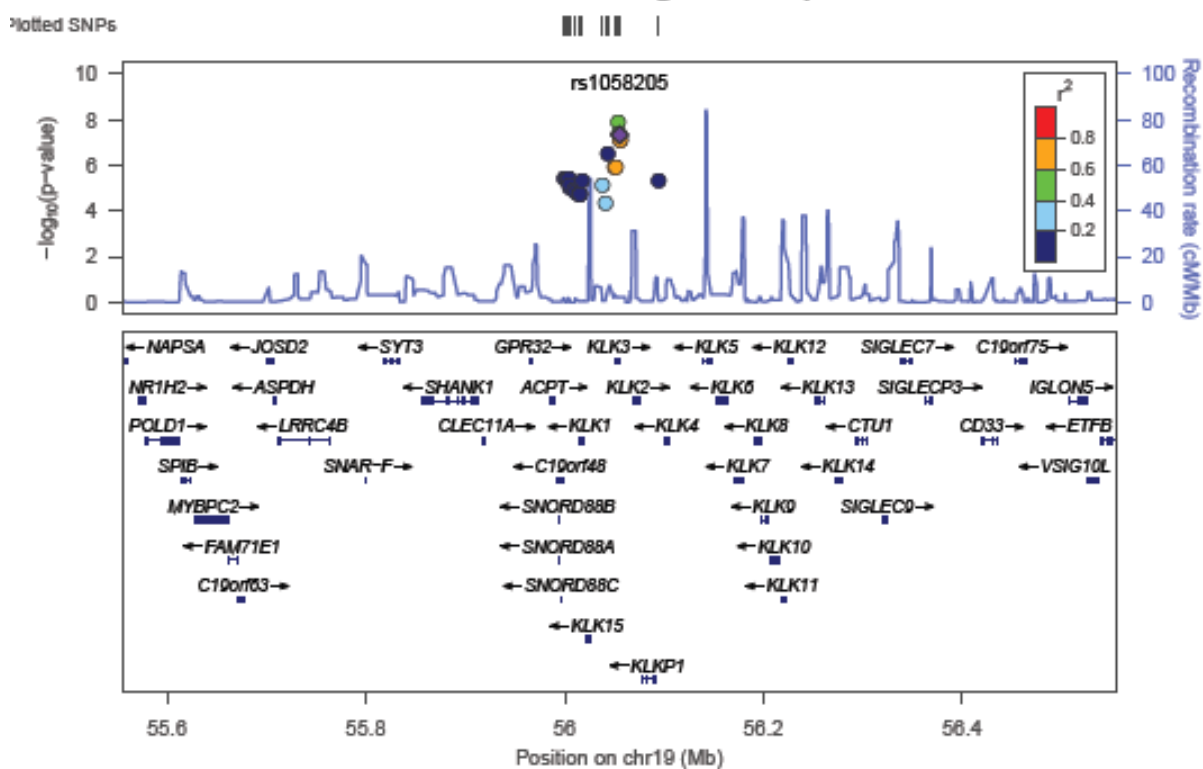

Supplement: NIHMS58112-supplement-1.pdf [file NIHMS58112-supplement-1.pdf]
